# Supplementary material for: Synechocystis sp. PCC 6803 overexpressing genes involved in CBB cycle and free fatty acid cycling enhances the significant levels of intracellular lipids and secreted free fatty acids
Source: PubMed Central journal article supplement (PMC7066134; doi:10.1038/s41598-020-61100-4), 2020-03-11

**Title: *Synechocystis* sp. PCC 6803 overexpressing genes involved in CBB cycle and free fatty acid cycling enhances the significant levels of intracellular lipids and secreted free fatty acids**

**Kamonchanock Eungrasamee<sup>1</sup>, Aran Incharoensakdi<sup>1</sup>, Peter Lindblad<sup>2</sup>, Saowarath Jantaro<sup>1\*</sup>**

<sup>1</sup> Laboratory of Cyanobacterial Biotechnology, Department of Biochemistry, Faculty of Science, Chulalongkorn University, Bangkok, 10330, Thailand

<sup>2</sup> Microbial Chemistry, Department of Chemistry – Ångström, Uppsala University, Box 523, SE-75120, Uppsala, Sweden

\* Corresponding author, E-mail address: saowarath.j@chula.ac.th, Tel. number: 66-(0)2-218-5431, Fax number: 66-(0)2-218-5418

**Supplementary information Table S1** Primers used in this study

| Name                 | Sequence (5' to 3')                         | Purpose of primer      | Target gene/<br>Expected size | PCR Cycles<br>/T <sub>m</sub> | Reference     |
|----------------------|---------------------------------------------|------------------------|-------------------------------|-------------------------------|---------------|
| Km_FBamHI            | TAGAGAGGATCCACGGTTGATGAG<br>AGCTTTGTTGTA    | PCR for <i>km'</i>     | 1122                          |                               | This study    |
| Km_FAcII             | TAGAGAAACGTTACGGTTGATGAG<br>AGCTTTGTTGTA    | PCR for <i>km'</i>     |                               |                               | This study    |
| Km_RBamHI            | TAGAGAGGATCCTGTGTCTCAAAA<br>TCTCTGATGTTAC   | PCR for <i>km'</i>     |                               |                               | This study    |
| aas_F3               | TAGAGATCTAGAGTGGACAGTGGC<br>CATGGCGC        | PCR for <i>aas</i>     | 2091                          |                               | <sup>3</sup>  |
| aas_R3               | TACAGAAGTACTAGTTTAAAACATTTT<br>GTCAATTA     | PCR for <i>aas</i>     |                               |                               | <sup>3</sup>  |
| GlpD_F               | TAGAGATCTAGAATGCGTAATTTT<br>CCAGAAATCC      | PCR for <i>glpD</i>    | 1668                          |                               | This study    |
| GlpD_R               | TAGAGAAGTACTAGTTTCAAGTGGAGACA<br>ATAGTCGGGA | PCR for <i>glpD</i>    |                               |                               | This study    |
| RBC_F                | TAGAGAAGTACTAGTATTGCCATAAG<br>TAAAGGCATCC   | PCR for <i>RubisCo</i> | 2815                          |                               | This study    |
| RBC_R                | TAGAGACTGCAGTAATTGACAATT<br>GACAATCCCCAC    | PCR for <i>RubisCo</i> |                               |                               | This study    |
| cm_F                 | TAGAGACCTAGTCGAGTTGATCGG<br>GCACGTAA        | PCR for <i>cm'</i>     | 905                           |                               | This study    |
| cm_R                 | TAGAGACCTAGTCAGCTCGAGGCT<br>TGGATTCT        | PCR for <i>cm'</i>     |                               |                               | This study    |
| bb-cSR               | GATATATCAACGGTGGTATATCCA                    | Sequencing             |                               |                               | This study    |
| RBC_SR2              | GGTTTGTGGACAATAAAGCTT                       | Sequencing             |                               |                               | This study    |
| GlpD_SR              | GCGGTGGTCCGTGGTGCCAAT                       | Sequencing             |                               |                               | This study    |
| GlpD_SF              | ATATGTGGAAGCGTTTGTGGATAA<br>A               | Sequencing             |                               |                               | This study    |
| Km_SF                | CGTCATCAAAATCACTCGCA                        | Sequencing             |                               |                               | This study    |
| Km_SR                | TGATGCATGGTTACTCACCCTGCG<br>G               | Sequencing             |                               |                               | This study    |
| UUSpsbA2             | CACTCAGATAGGAGCCATCTTGC                     | Colony PCR             |                               |                               | This study    |
| USpsbA2              | CTTTAGCGTTCCAGTGGATA                        | Colony PCR             |                               |                               | This study    |
| DSpsbA2              | GCGATCGCCTTGGCAAAACAATA                     | Colony PCR             |                               |                               | This study    |
| DDSpsbA2             | CCCGTAGTTGTTCAATGATGATGA<br>T               | Colony PCR             |                               |                               | This study    |
| USrubisco            | GCAACCCCTGATTAGCTTTGCG                      | Colony PCR             |                               |                               | This study    |
| DSrubisco            | CCGGAATACTCCCCTGGGAA                        | Colony PCR             |                               |                               | This study    |
| USGlpD               | CCTACTGCGGGAAGCCTACGCCG                     | Colony PCR             |                               |                               | This study    |
| DSGlpD               | CTTAACCGTTGGCTATGGCGACAG                    | Colony PCR             |                               |                               | This study    |
| bb fl                | AGTTAGCCGTAGTTAGCCC                         | Colony PCR             |                               |                               | This study    |
| RTglpD_F420          | GAATATGCGGAACGGTTAGAT                       | RT-PCR for <i>glpD</i> | 420                           | 26 cycles                     | This study    |
| RTglpD_R420          | GCGGTGGTCCGTGGTGCCAAT                       | RT-PCR for <i>glpD</i> |                               | /53.5 °C                      | This study    |
| RT <i>rbcL</i> _F420 | GGTTTTAAGGCTCTGCGGGC                        | RT-PCR for <i>rbcL</i> | 420                           | 23 cycles                     | This study    |
| RT <i>rbcL</i> _R420 | GATGATGGGGGTGCCAATTTCT                      | RT-PCR for <i>rbcL</i> |                               | /58 °C                        | This study    |
| RT <i>rbcS</i> _F300 | CAAGCCGTTCTCAGGATCCAG                       | RT-PCR for <i>rbcS</i> | 300                           | 22 cycles                     | This study    |
| RT <i>rbcS</i> _R300 | AGGGAAATTATCGACTTCGGCTA                     | RT-PCR for <i>rbcS</i> |                               | /56 °C                        | This study    |
| RTlipA_F379          | TTGGCGGAGCAAGTGAAGCAAT                      | RT-PCR for <i>lipA</i> | 379                           | 25 cycles                     | <sup>3</sup>  |
| RTLipA_R379          | CATGGACCAGCACAGGCAAAAT                      | RT-PCR for <i>lipA</i> |                               | /55.1 °C                      |               |
| RTaccA_F428          | ATGCACGGCGATCGAGGAGGT                       | RT-PCR for <i>accA</i> | 428                           | 27 cycles                     | <sup>3</sup>  |
| RTaccA_R428          | TGGAGTAGCCACGGTGTACAC                       | RT-PCR for <i>accA</i> |                               | /58.2 °C                      |               |
| RT16sRNA_F521        | AGTTCTGACGGTACCTGATGA                       | RT-PCR for <i>16s</i>  | 521                           | 13 cycles                     | <sup>3</sup>  |
| RT16sRNA_R521        | GTCAAGCCTTGGTAAGGTTAT                       | RT-PCR for <i>16s</i>  |                               | /56 °C                        |               |
| RTaas_F307           | GTGGTTTATCGCCGATCAAG                        | RT-PCR for <i>aas</i>  | 307                           | 28 cycles                     | <sup>3</sup>  |
| RTaas_R307           | TTCCTGGCGGGGAACGGGAG                        | RT-PCR for <i>aas</i>  |                               | /54.5 °C                      |               |
| RTPlsX_F             | AAGGGGTGGTGGAAATGGAA                        | RT-PCR for <i>PlsX</i> | 488                           | 27 cycles                     | <sup>13</sup> |
| RTPlsX_R             | AAGTAGGTCCCTTCCTTCGG                        | RT-PCR for <i>PlsX</i> |                               | /52.7 °C                      |               |

**Supplementary information Figure S1**

The full-length of gel from RT-PCR products of each gel was shown as followings. In each gel picture, we cropped gel by cutting out the non-related bands, Lane 2, of other samples (WTd).

*accA*, 58.2C, 27 cycles

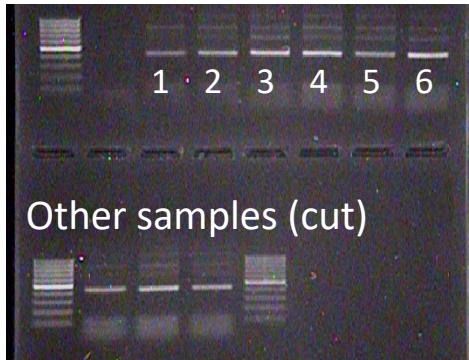

Lane  
1: WT  
2: WTd (cropped)  
3: OA  
4: OG  
5: OAG  
6: OAGR

*lipA* 55.1 C, 25 cycles

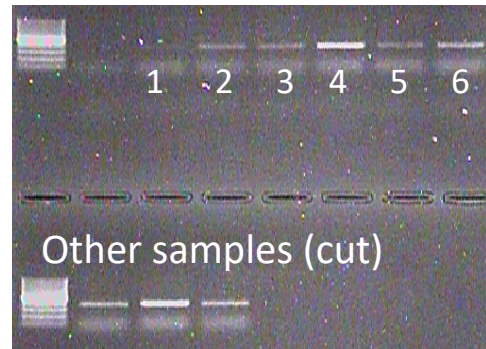

*plsX*, 52.7C, 27 cycles

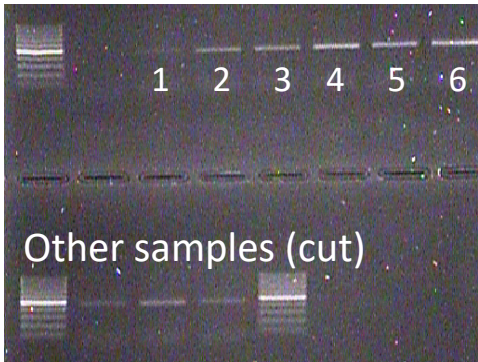

*rbcS* 56 C, 22 cycles

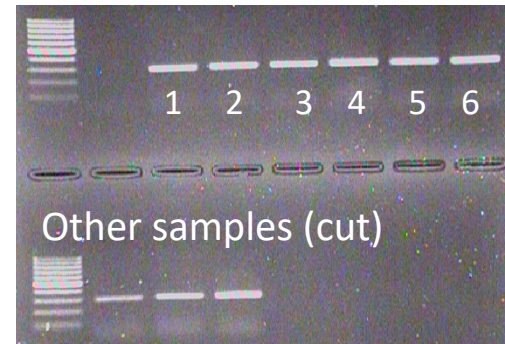

*aas*, 54.5 C, 28 cycles

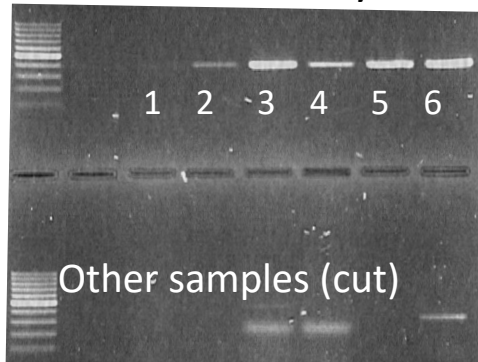

*rbcL* 58 C, 23 cycles

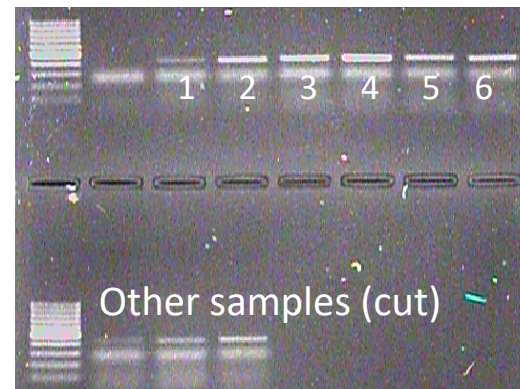

*glpD*, 53.5 C, 26 cycles

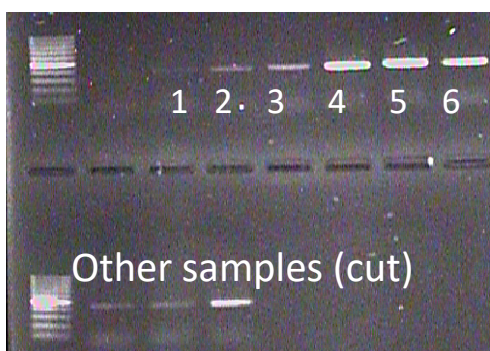

*16S*, 56 C, 13 cycles

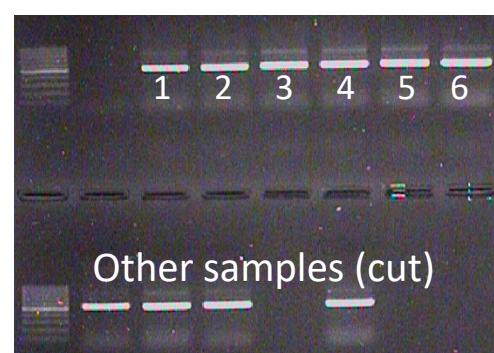

Supplement: 41598_2020_61100_MOESM1_ESM.pdf [file 41598_2020_61100_MOESM1_ESM.pdf]
